# Supplementary material for: Synthesis of a bistriazolyl-phenanthroline–Cu(ii) complex immobilized on nanomagnetic iron oxide as a novel green catalyst for synthesis of imidazoles via annulation reactions
Source: Royal Society of Chemistry journal article supplement (doi:10.1039/d3na00653k), 2023-01-01
Supplement: d3na00653k1.pdf [file d3na00653k1.pdf]

## Synthesis Of Bistriazolyl-Phenanthroline-Cu(II) Complex Immobilized On Nanomagnetic Iron Oxide as a Novel Green Catalyst For Synthesis Of Imidazoles Via Annulation Reactions

Raed H. Althomali <sup>a</sup>, Ebraheem Abdu Musad Saleh <sup>\*a</sup>, Riyadh Hasan Mohammed Ali <sup>c</sup>, Ikromjon Ilkhomidinovich Mamadoliev <sup>d</sup>, Montather F. Ramadan <sup>e</sup>, Ashwaq Talib Kareem <sup>f</sup>, Saurabh Aggarwal <sup>g</sup>, Salema K. Hadrawi <sup>h</sup>

<sup>a</sup>Department of Chemistry, Prince Sattam Bin Abdulaziz University, College of Arts and Science, Wadi Al-Dawasir 11991, Saudi Arabia.

<sup>b</sup> Department of Medical Laboratory, Al-Rafidain University College, Iraq-Baghdad.

<sup>c</sup> Teaching Assistant, Research scholar, Department of Medical Chemistry, Samarkand State Medical Institute, Samarkand, Uzbekistan.

<sup>d</sup> Teaching Assistant, Department of Anatomy, Tashkent State Dental Institute, Tashkent, Uzbekistan.

<sup>e</sup> College of Dentistry, Al-Ayen University, Thi-Qar, Iraq.

<sup>f</sup> College of Pharmacy/ National University of Science and Technology, Dhi Qar, Iraq.

<sup>g</sup> Department of Mechanical Engineering, Uttaranchal Institute of Technology, Uttaranchal University, Dehradun-248007, India.

<sup>h</sup> Refrigeration and Air-conditioning Technical Engineering Department, College of Technical Engineering, The Islamic University, Najaf, Iraq.

**\*Corresponding author, Email: [eabdumusadsaleh@gmail.com](mailto:eabdumusadsaleh@gmail.com)**

**Copies of NMR spectra:**

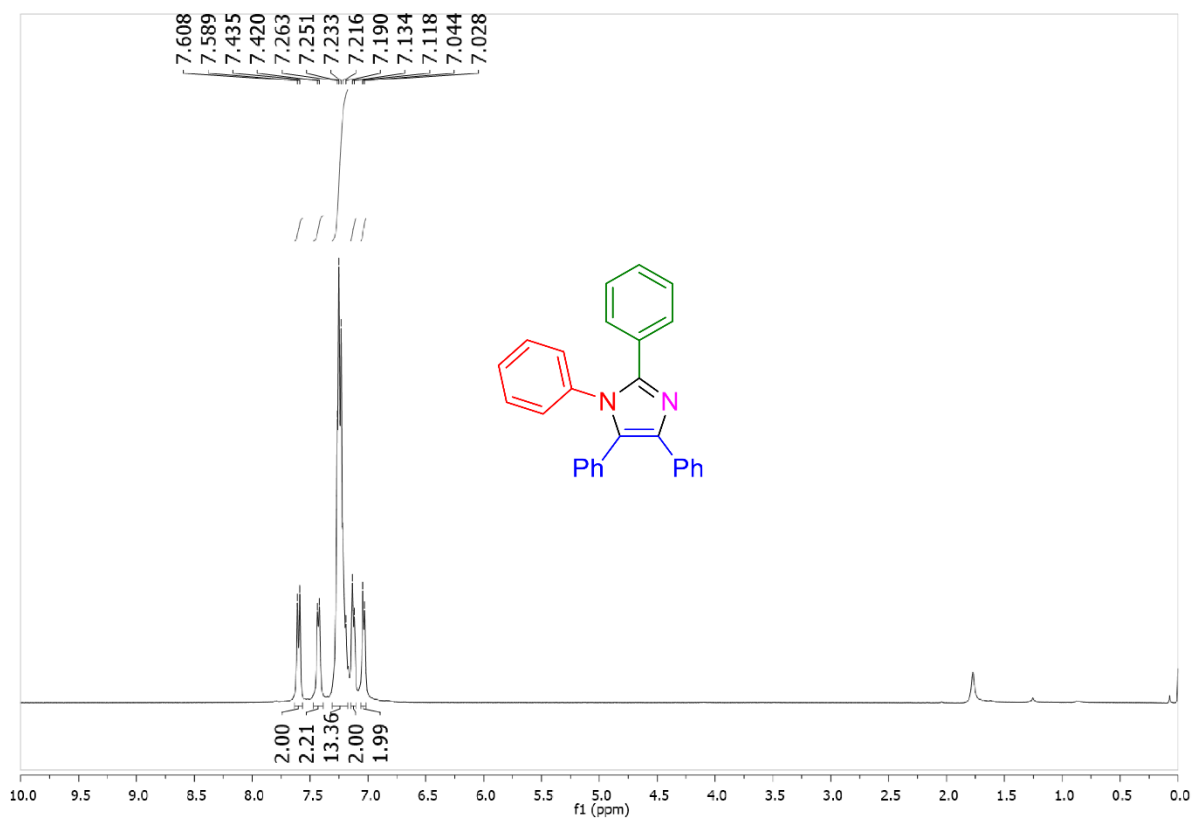

*Figure S. 1*

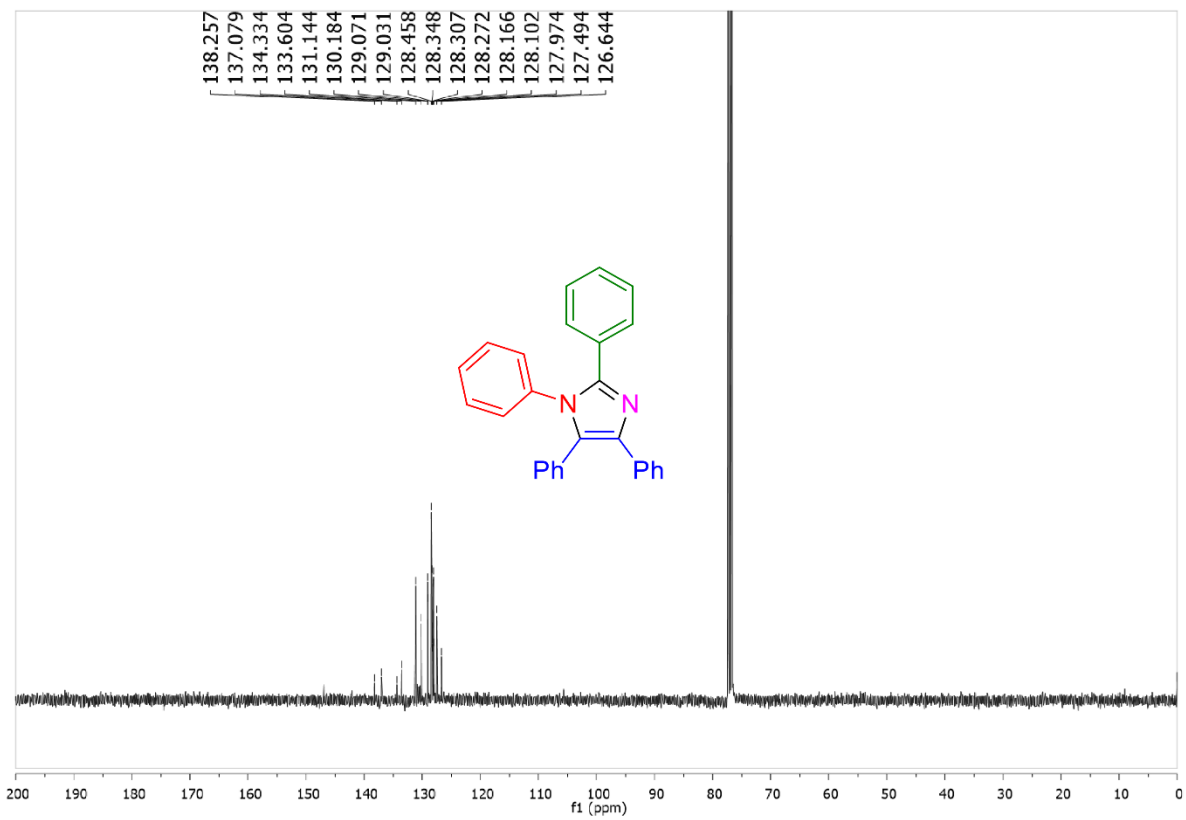

*Figure S. 2*

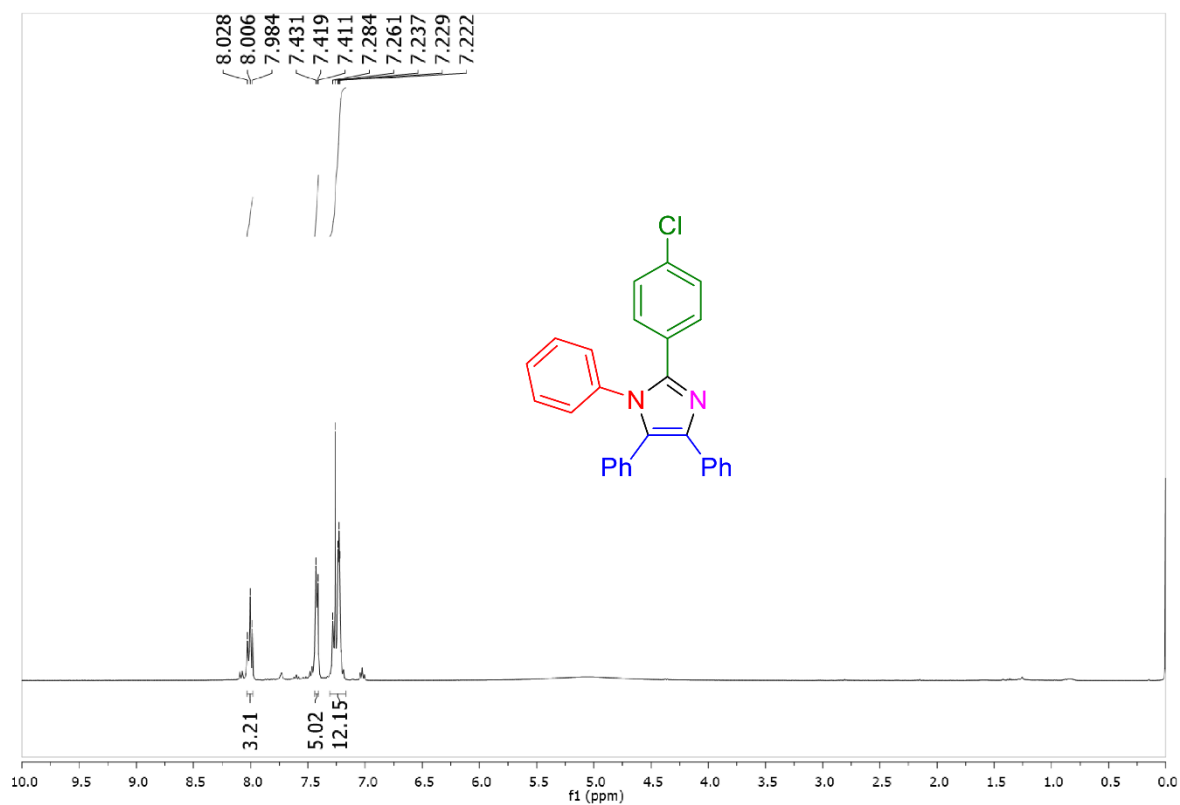

*Figure S. 3*

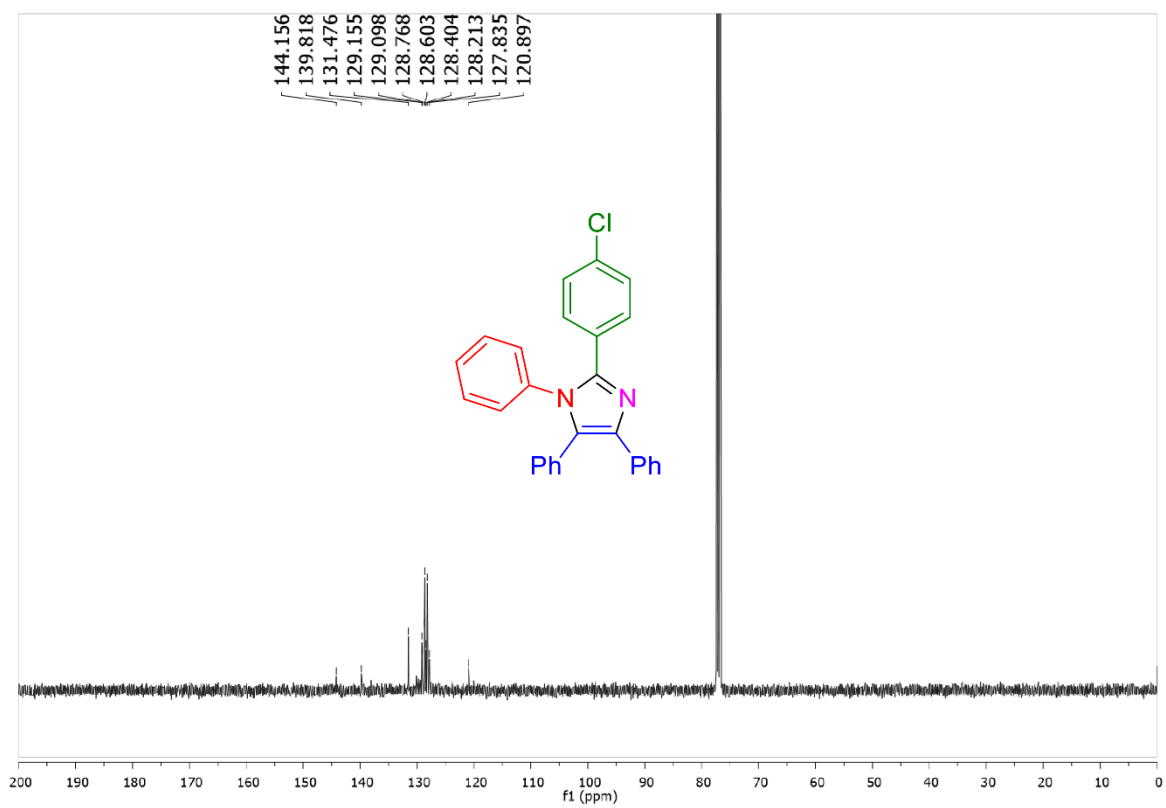

*Figure S. 4*

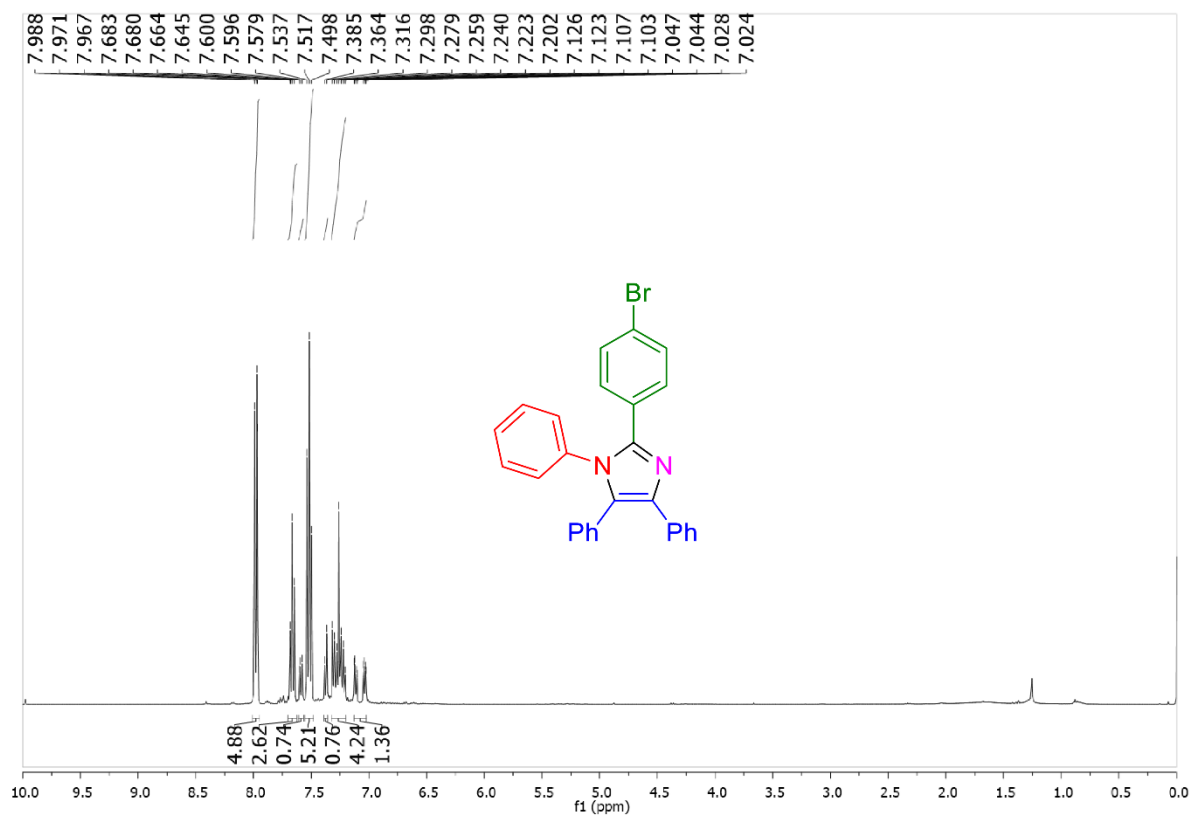

Figure S. 5

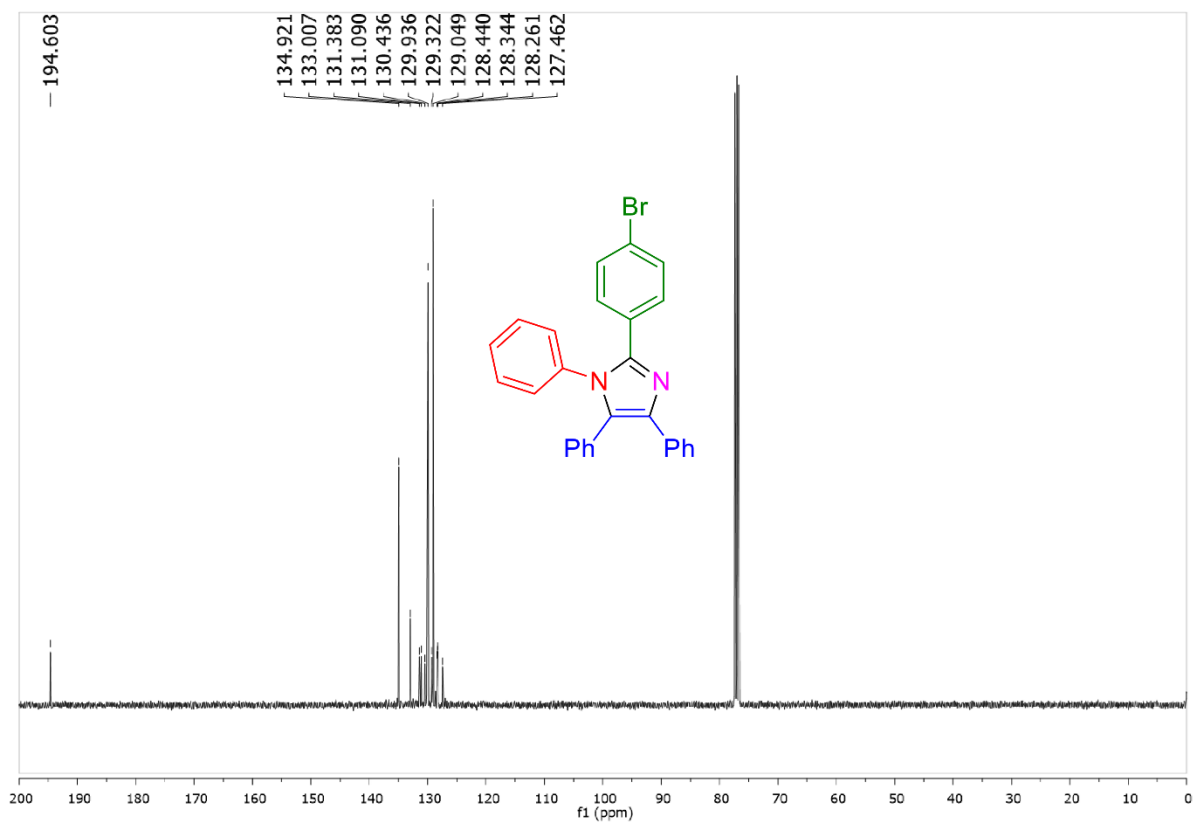

Figure S. 6

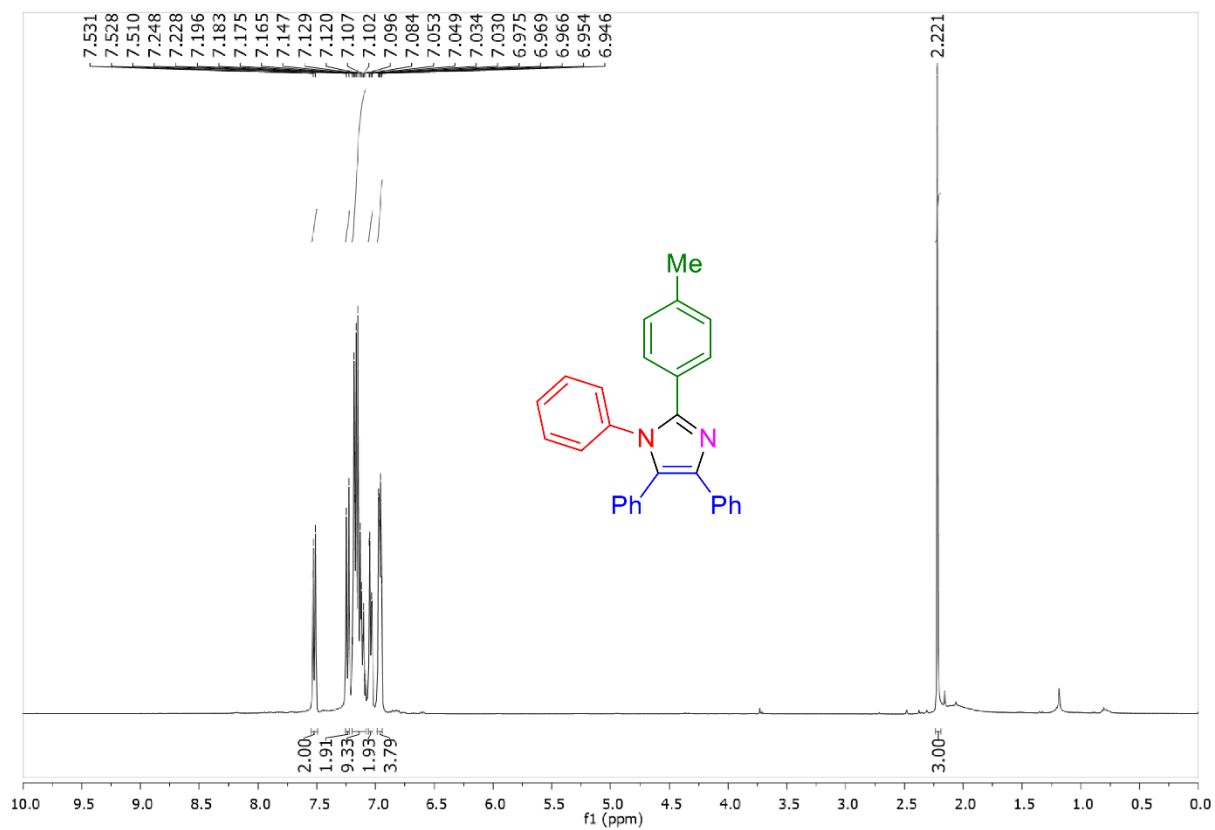

Figure S. 7



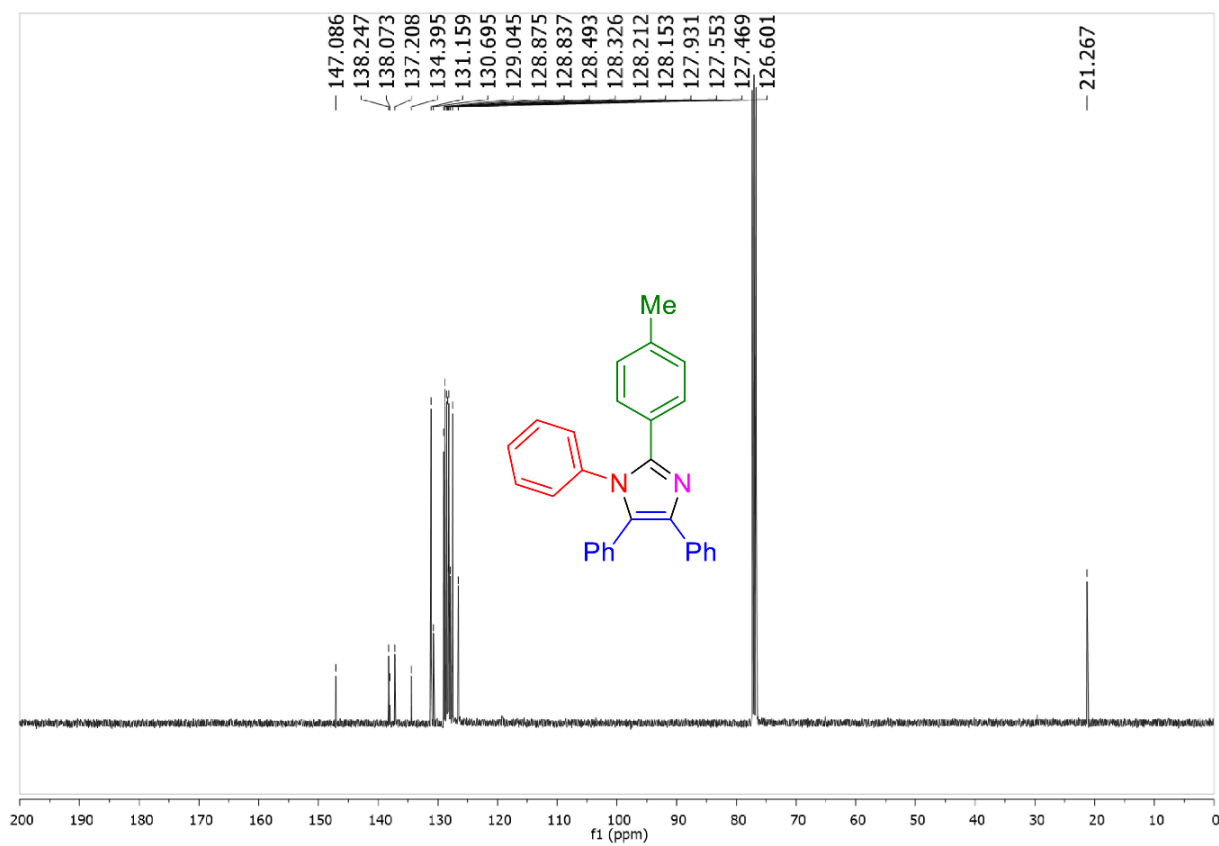

*Figure S. 8*

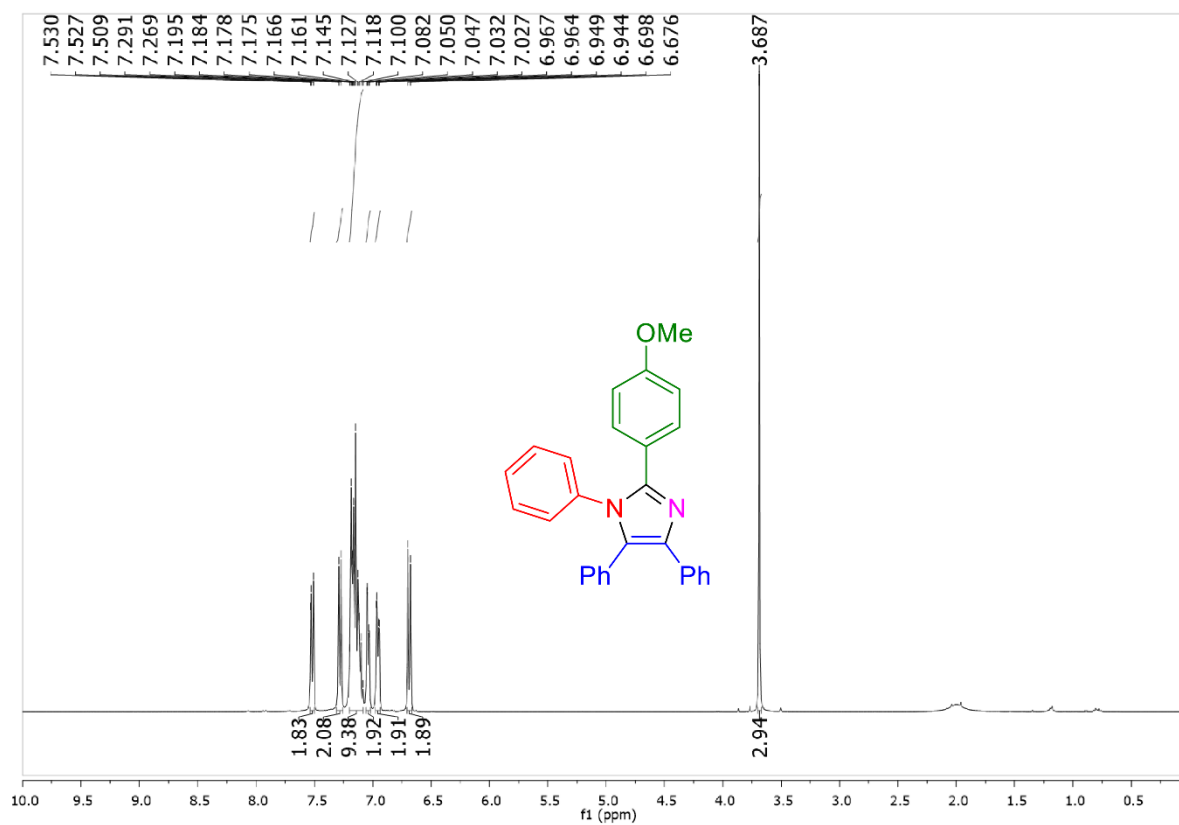

Figure S. 9

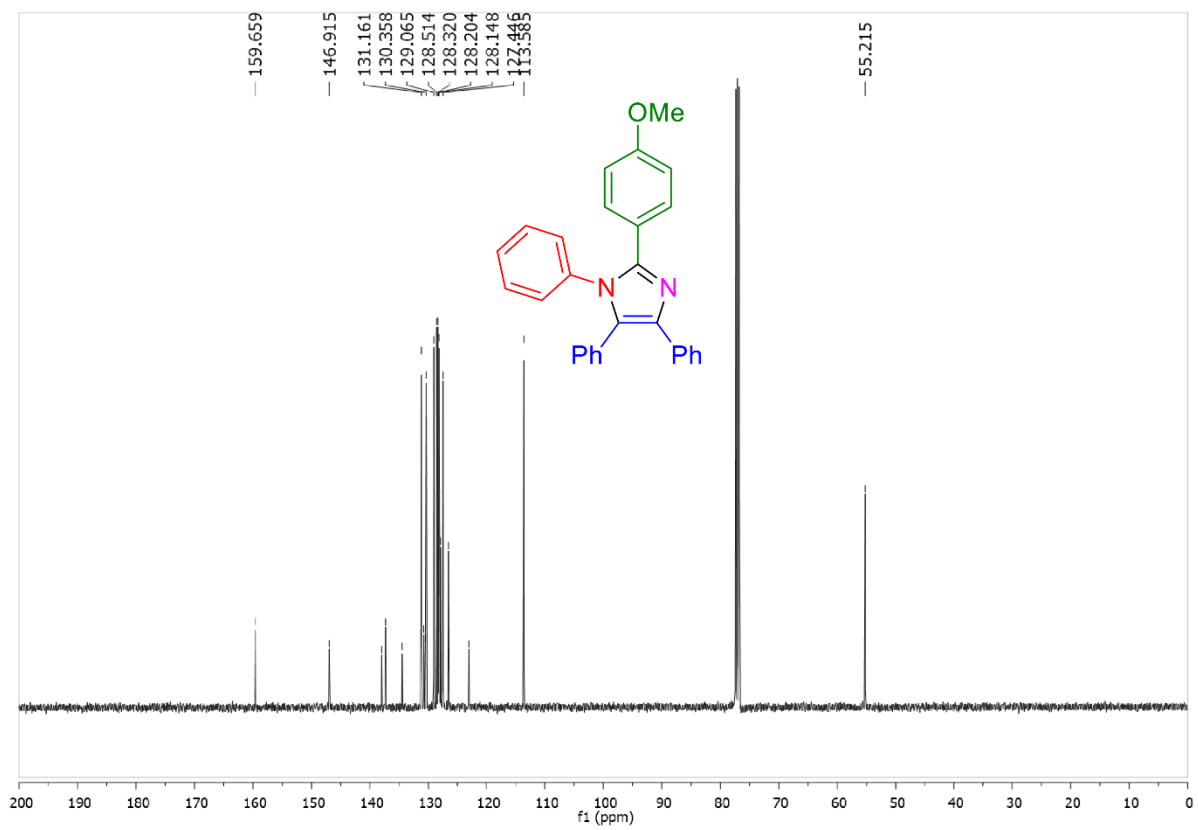

Figure S. 10

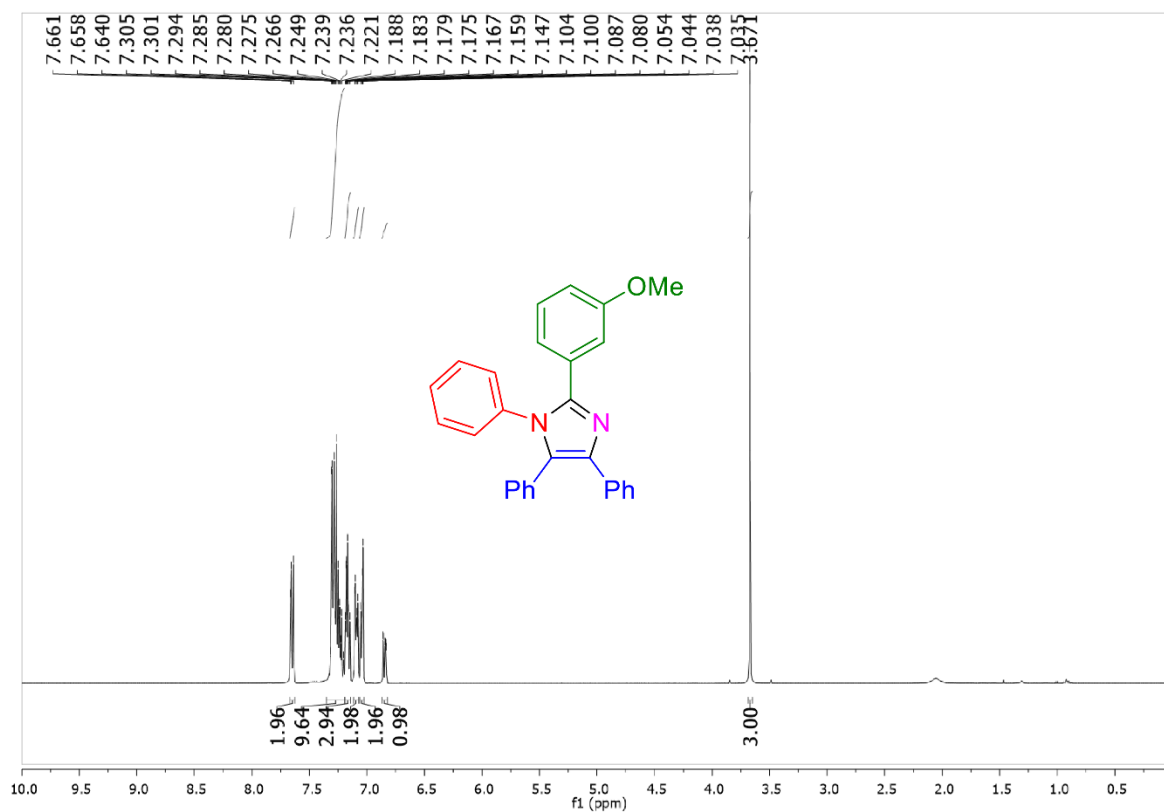

*Figure S. 11*

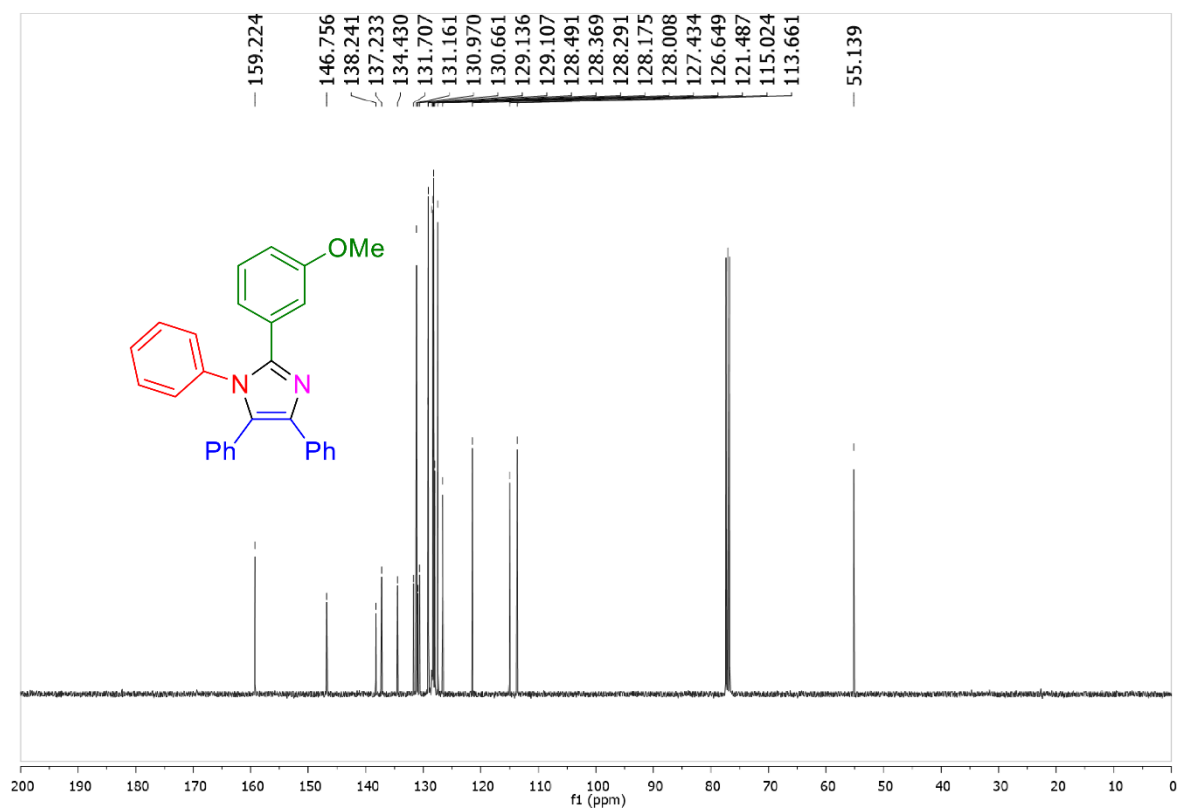

Figure S. 12

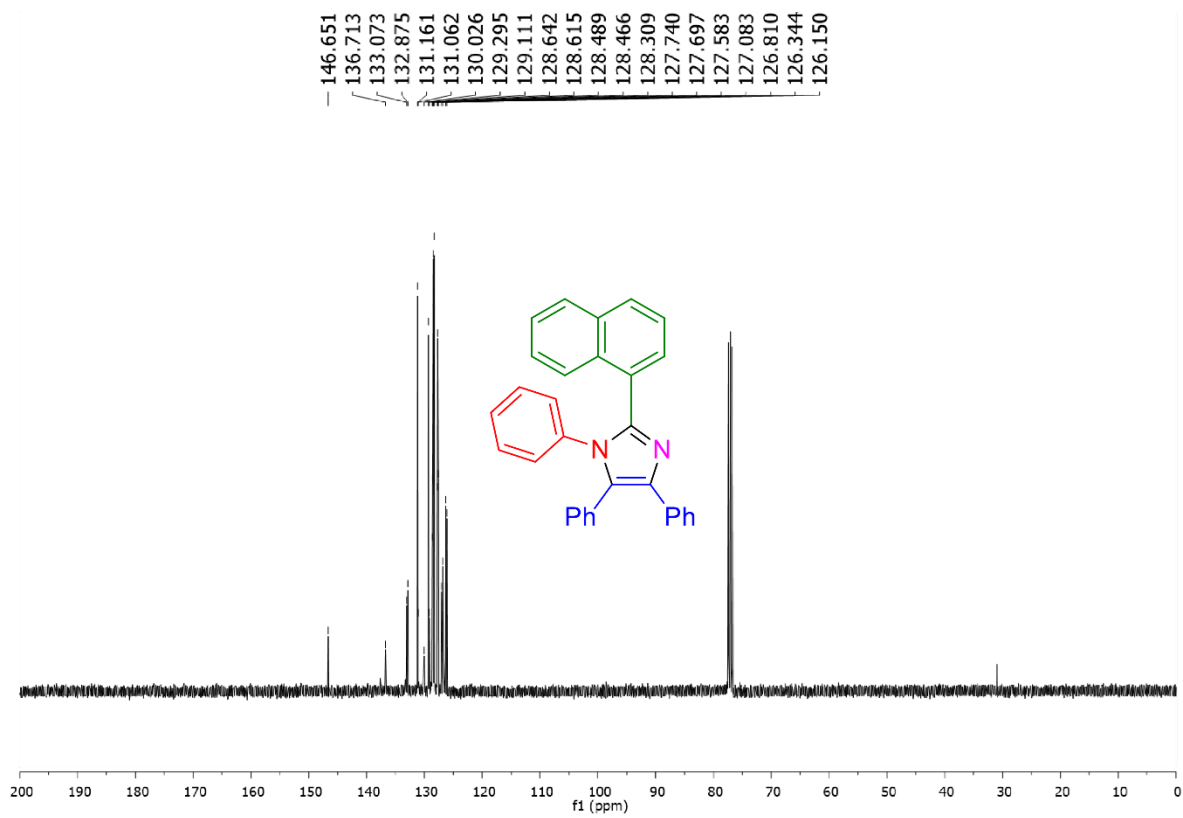

*Figure S. 13*

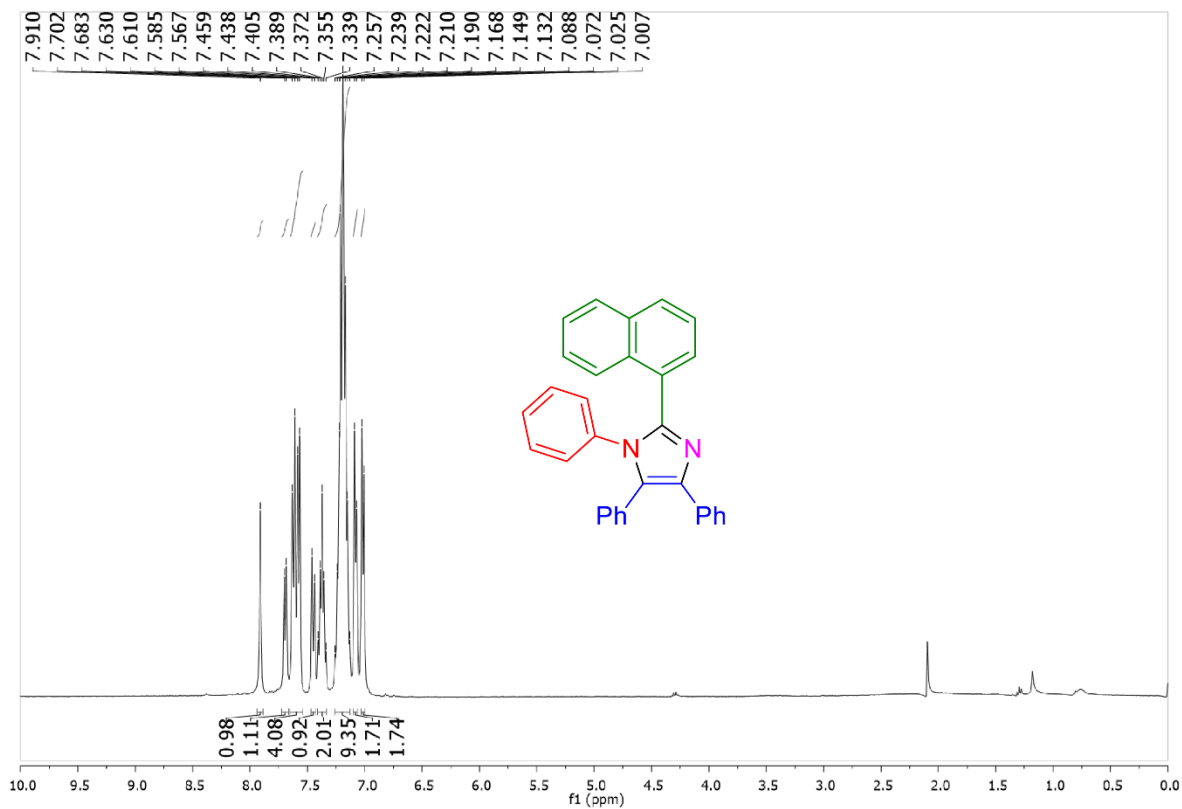

Figure S. 14

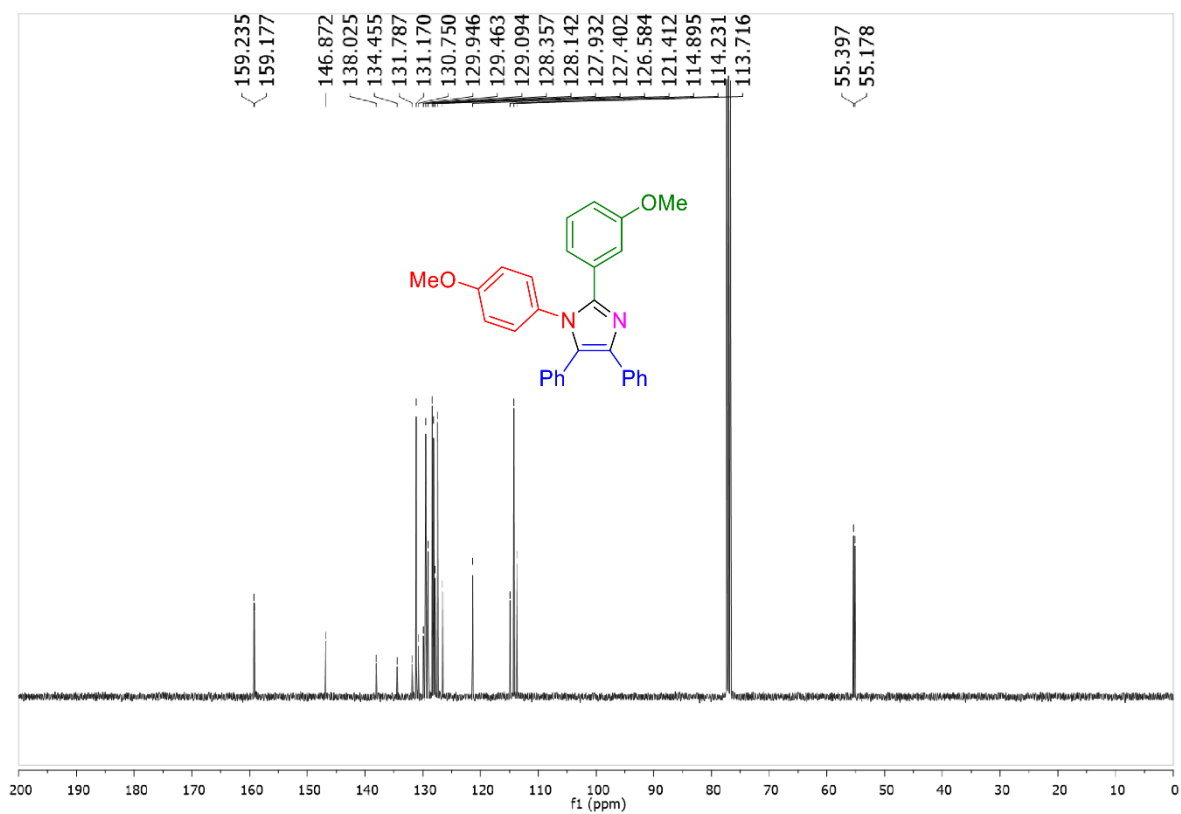

*Figure S. 15*



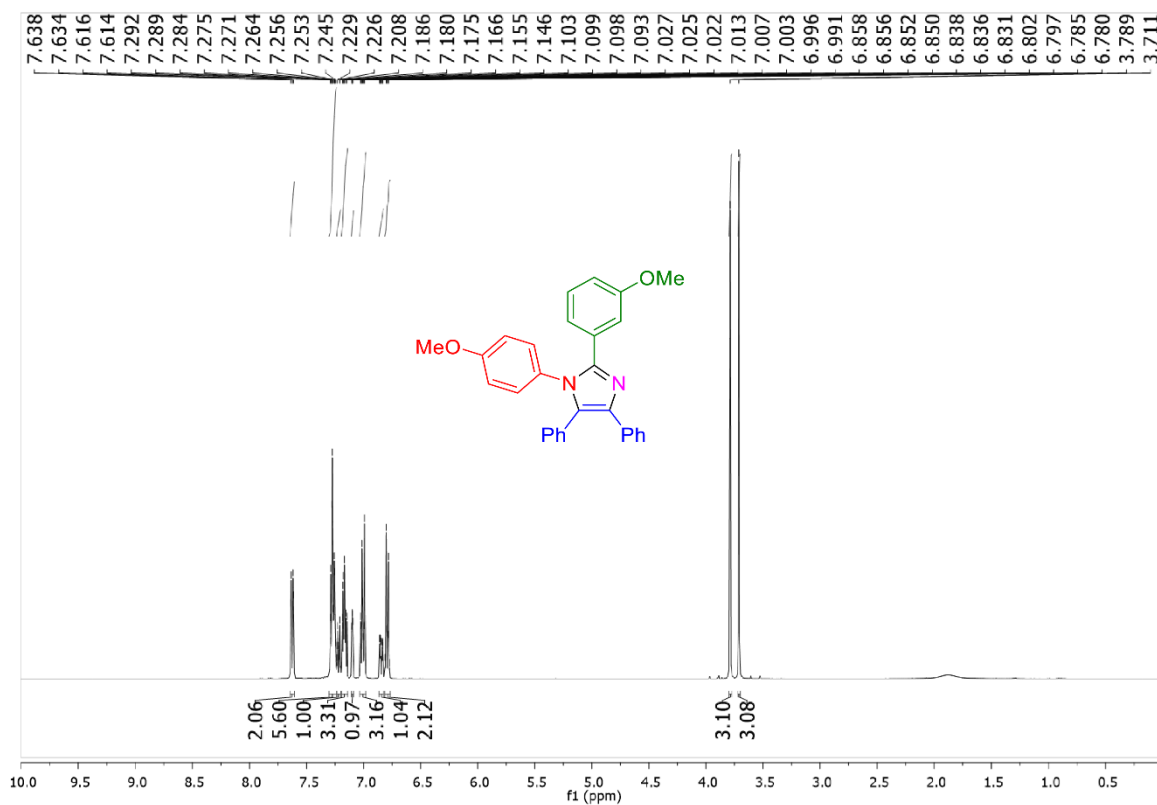

Figure S. 16

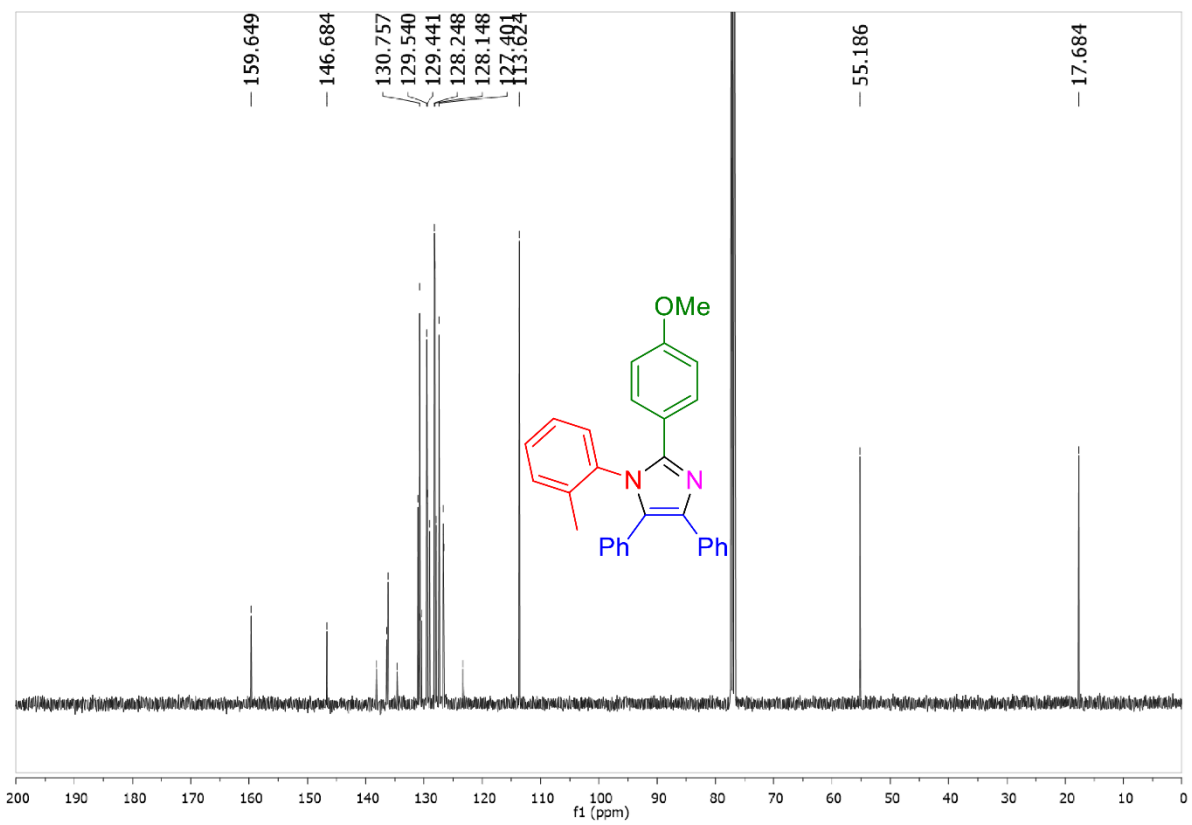

*Figure S. 17*

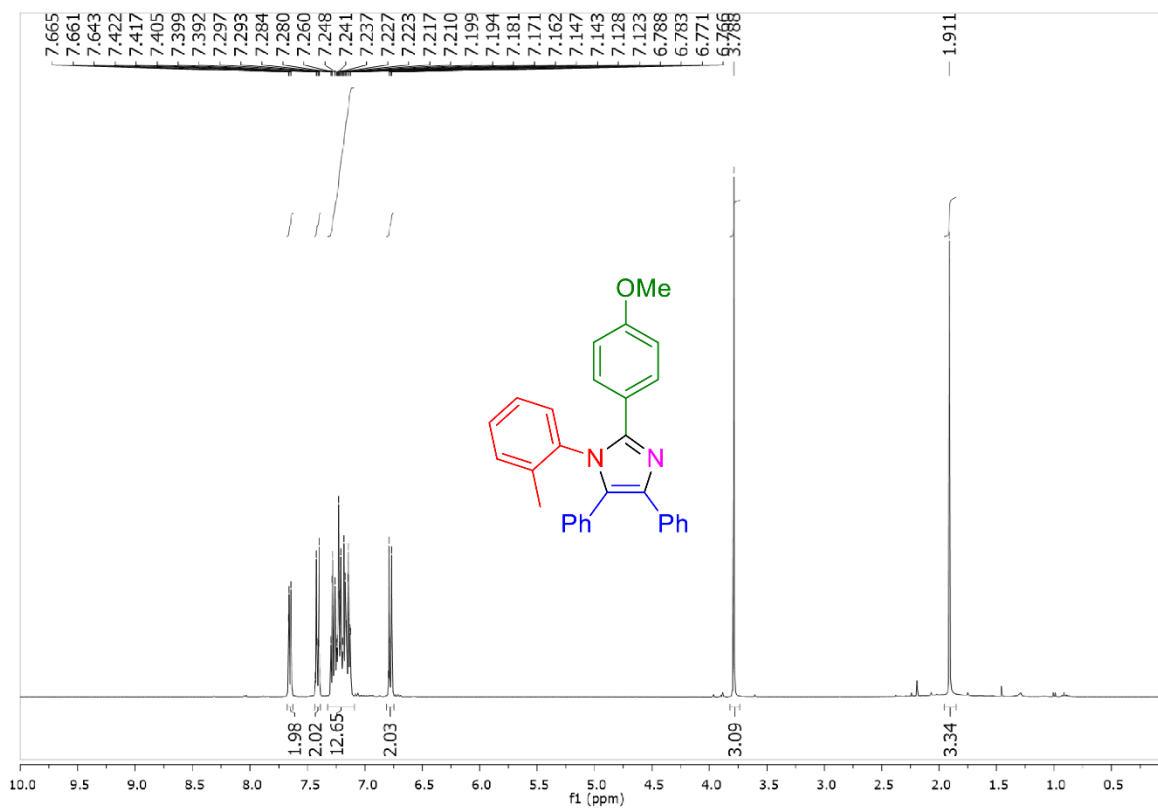

*Figure S. 18*

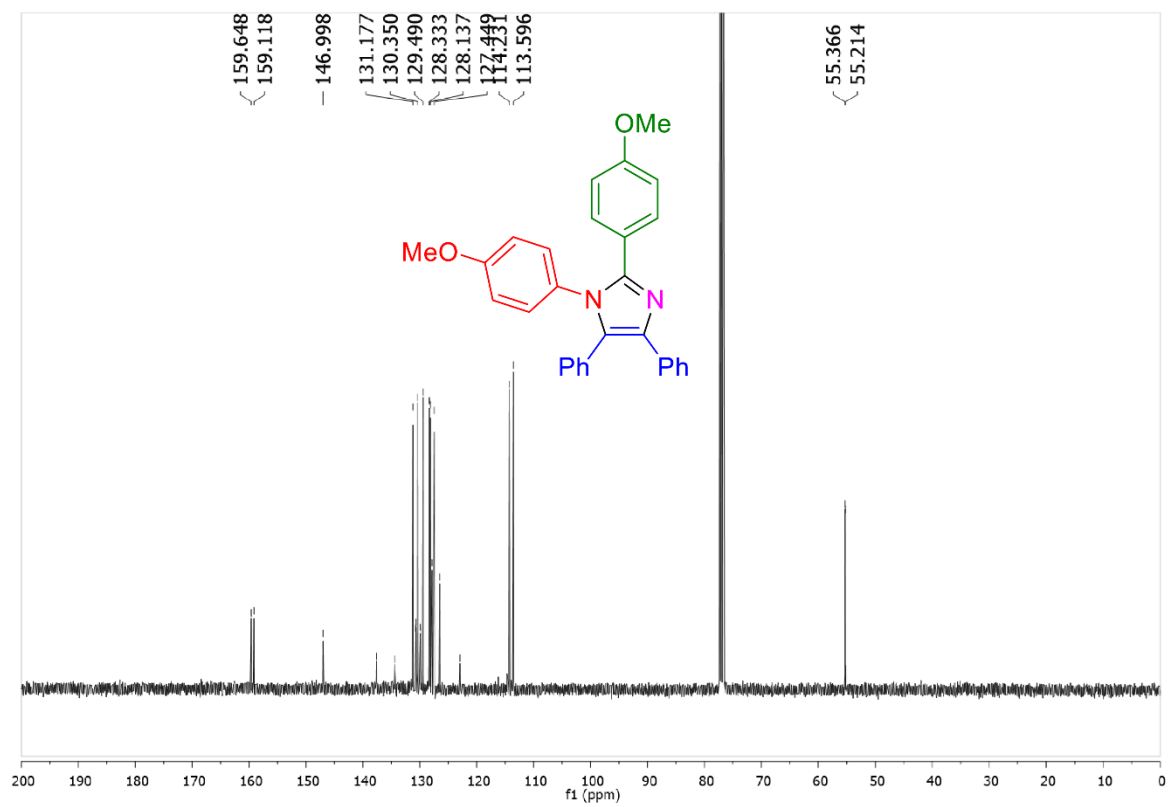

*Figure S. 19*

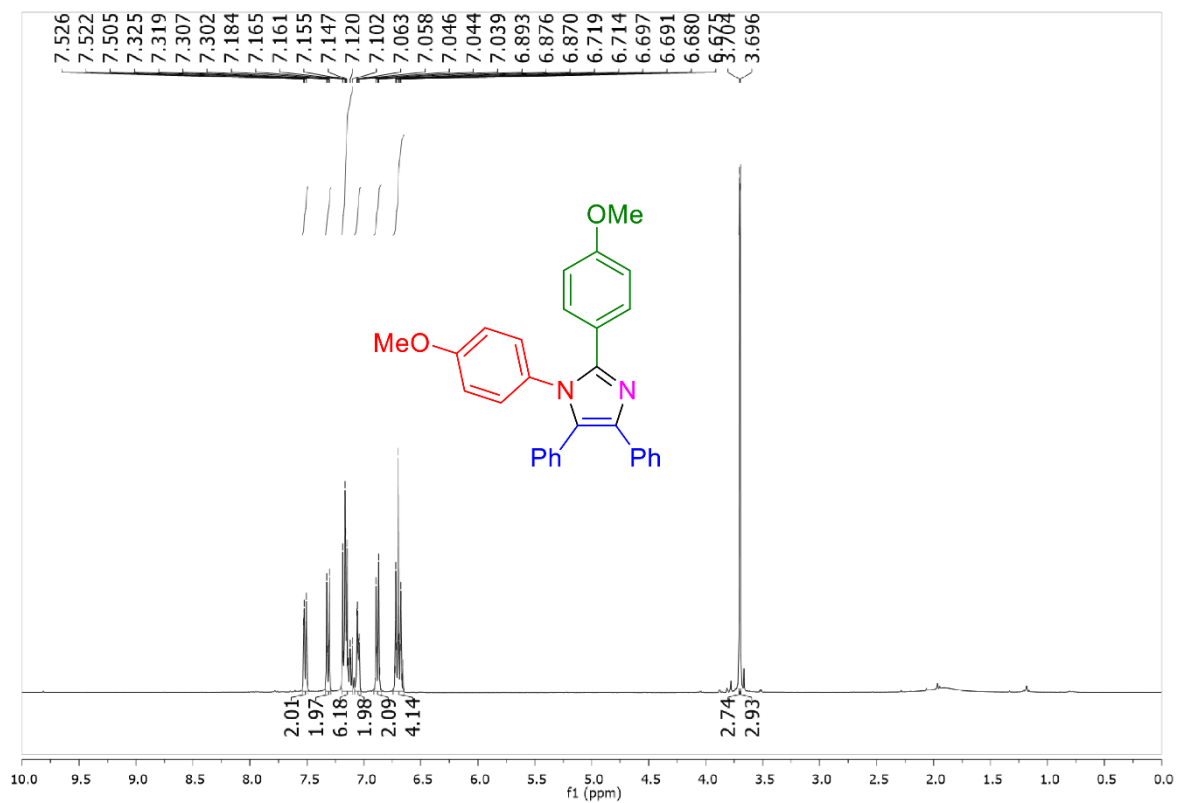

**Figure S. 20**

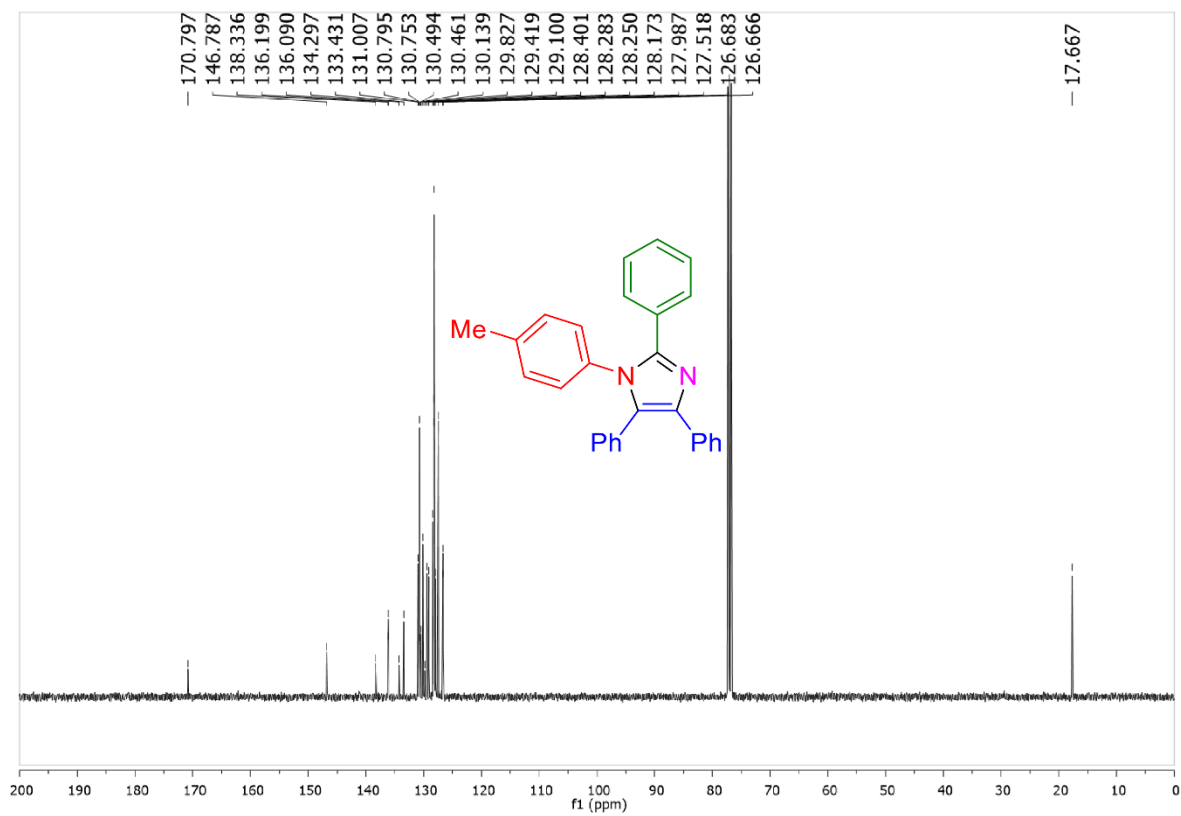

*Figure S. 21*

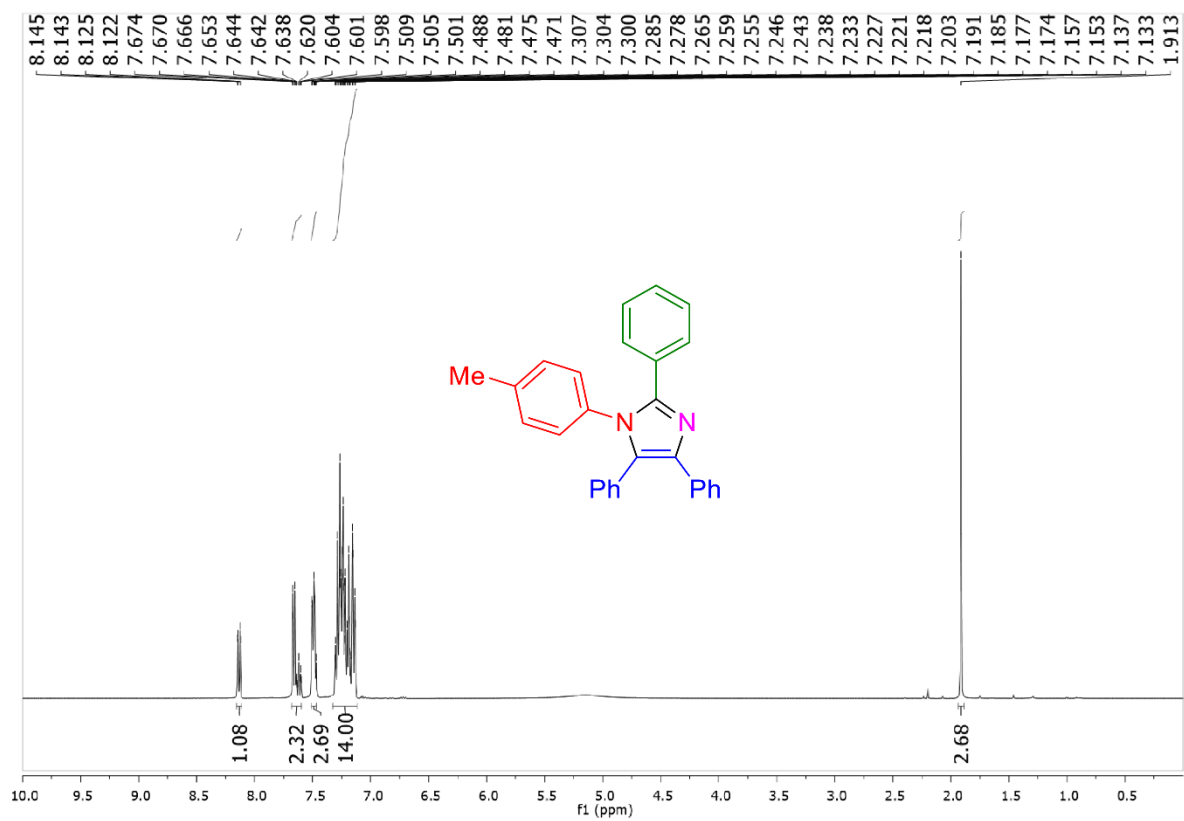

Figure S. 22

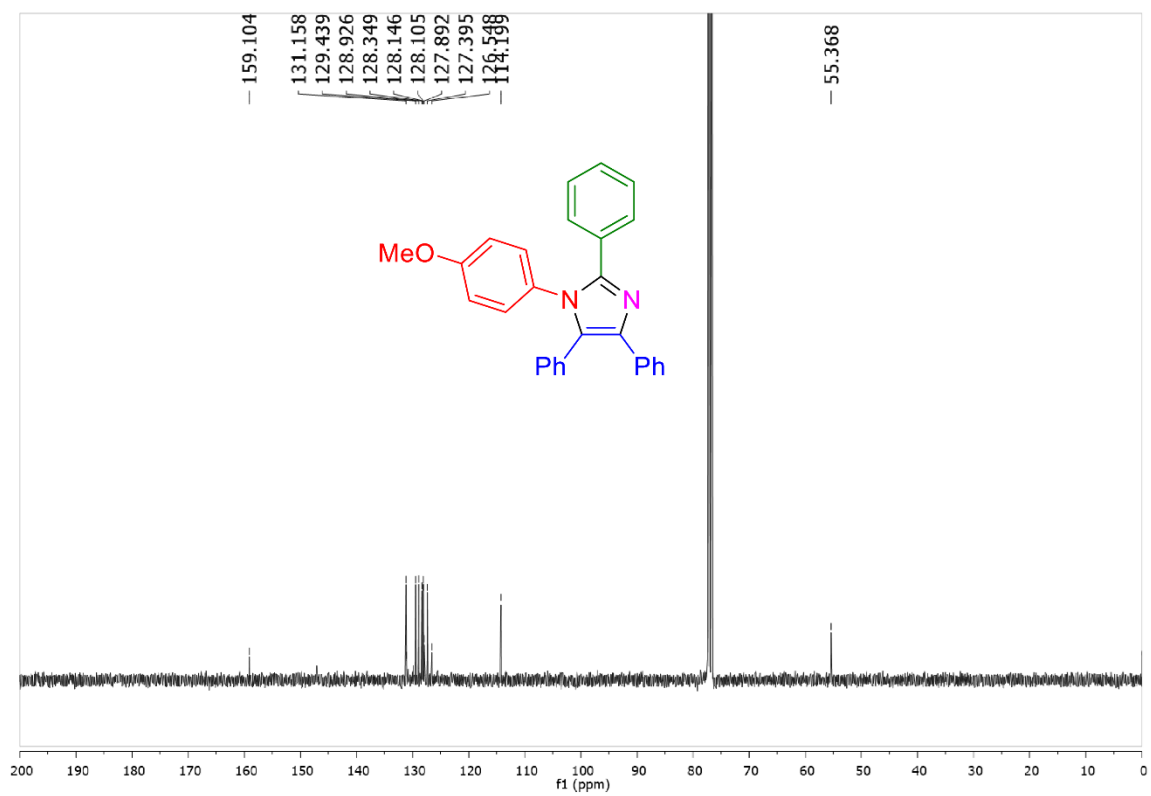

*Figure S. 23*



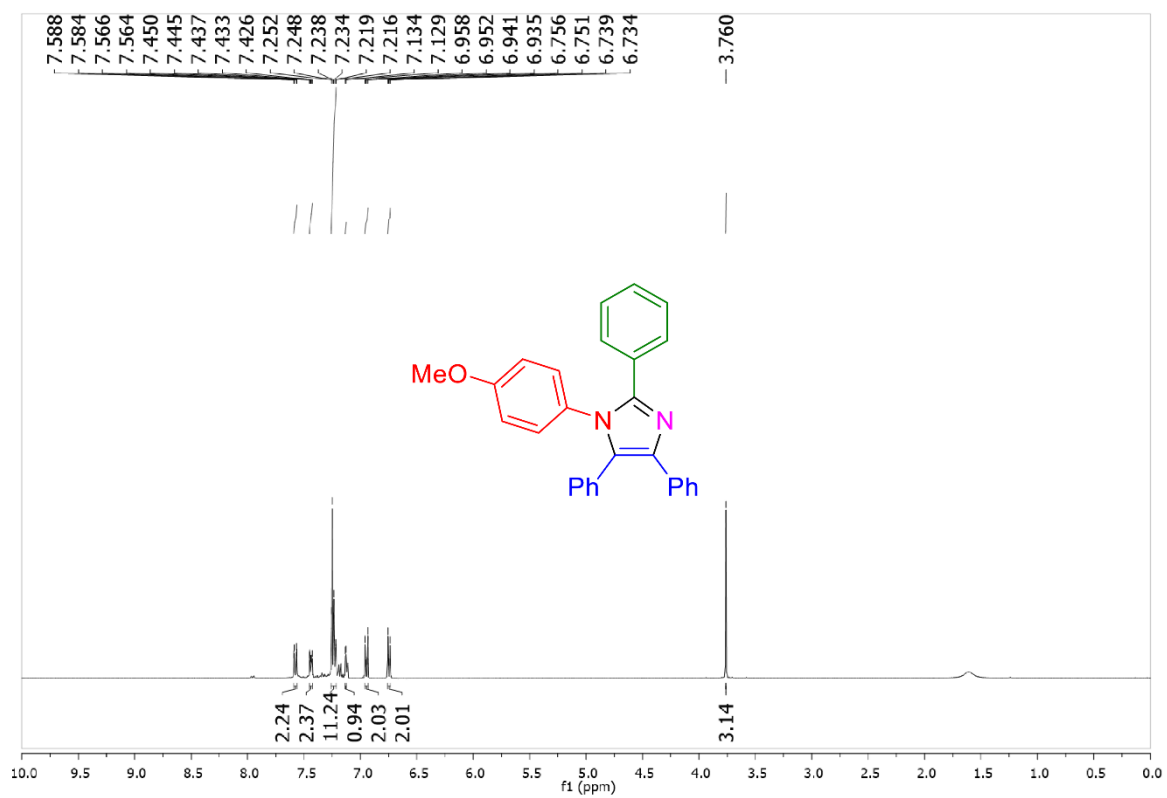

*Figure S. 24*
